# Supplementary material
Source: PubMed Central journal article supplement (PMC4026971)
Supplement: co3001583_si_001.pdf [file co3001583_si_001.pdf]

# **Supporting Information: Quantum Efficiency and Bandgap Analysis for Combinatorial Photovoltaics: Sorting Activity of Cu-O Compounds in All-Oxide Device Libraries**

*Assaf Y. Anderson, Yaniv Bouhadana, Hannah-Noa Barad,*

*Benjamin Kupfer, Eli Rosh-Hodesh, Hagit Aviv, Yaakov R. Tischler, Sven Rühle and Arie Zaban*

**Table S1.** PLD deposition parameters for absorber on glass and in device.

|                                                          |         |          |
|----------------------------------------------------------|---------|----------|
| sample_name                                              | 120626a | 120618e  |
| sample_id                                                | 609     | 576      |
| Substrate                                                | glass   | TEC7     |
| materials                                                | CuO     | TiO2 CuO |
| layer_id                                                 | 1077    | 1177     |
| material                                                 | CuO     | CuO      |
| sub_layer                                                | 1284    | 1391     |
| Target sample distance (mm)<br><small>(97+40-82)</small> | 55      | 55       |
| beam_scanner (cm)                                        | 51      | 51       |
| repetition_rate (Hz)                                     | 8       | 8        |
| rastering_vel (mm s <sup>-1</sup> )                      | 29      | 29       |
| target_vel (mm s <sup>-1</sup> )                         | 29      | 29       |
| rastering_angle_from (deg)                               | 145     | 145      |
| rastering_angle_to (deg)                                 | 180     | 180      |
| substrat_vel (mm s <sup>-1</sup> )                       | 0       | 0        |
| substrat_pos (deg)                                       | 0       | 0        |
| Gas                                                      | 0       | 0        |
| MKS (sccm)                                               | 5       | 5        |
| gas_pressure (mTorr)                                     | 0.00291 | 0.00301  |
| Temperature (C)                                          | 23      | 23       |
| ramp_rate_inc (deg min <sup>-1</sup> )                   | 1       | 1        |
| ramp_rate_dec (deg min <sup>-1</sup> )                   | 1       | 1        |
| post_ann_temp (C)                                        | 23      | 23       |
| post_ann_time (min)                                      | 1       | 1        |
| laser_voltage (kV)                                       | 22      | 22       |
| laser_energy_fluence (mJ)                                | 191     | 167      |
| laser_power (W)                                          | 0.96    | 0.83     |
| laser_pressure (mBar)                                    | 3334    | 3293     |
| laser_energy_fluence_messured (mJ)                       | 100     | 100.8    |
| pulses                                                   | 45000   | 45000    |
| pulses_cycles                                            | 1       | 1        |
| layer_number                                             | 1       | 2        |
| id                                                       | 366     | 383      |
| remarks                                                  |         | TiO2     |

In order to obtain the TiO<sub>2</sub> monochromatic absorption coefficient, two additional partial libraries were sprayed with TiO<sub>2</sub> on TEC7, under the same routine as that used for this work. The libraries were scanned with the optical scanner and analyzed for absorptance. TEC7 was scanned separately, and the FTO + 2.2 mm glass absorptance was calculated. The TiO<sub>2</sub> absorptance was calculated. The libraries were taken to cross section focused ion beam (FIB), and the FTO and TiO<sub>2</sub> layers thickness were measured several times for several locations along a line in the libraries. From the TiO<sub>2</sub> absorptance values and the measured thickness, the absorption coefficient was calculated.

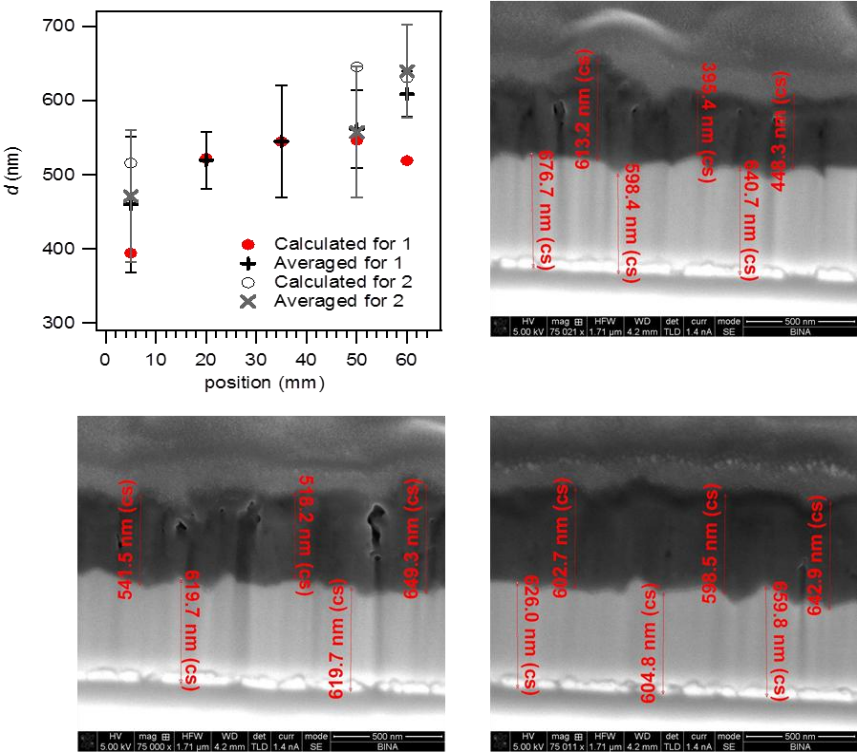

**Figure S1.** In order to obtain the Cu<sub>x</sub>O thickness, profilometer measurements were taken on the PLD deposition shoulder. The thickness profile of the entire library was obtained with eq. **Error! Reference source not found.**, as explained in the Cu<sub>x</sub>O thickness section.

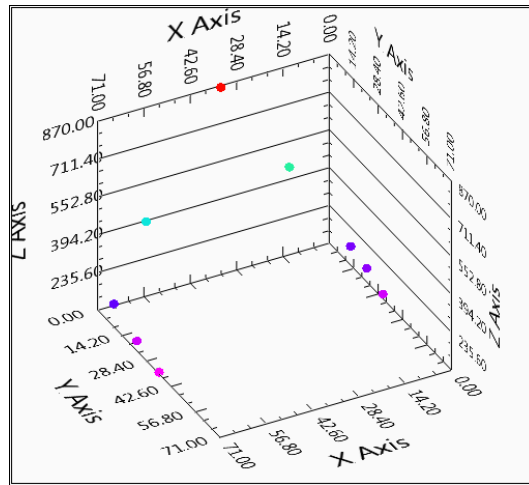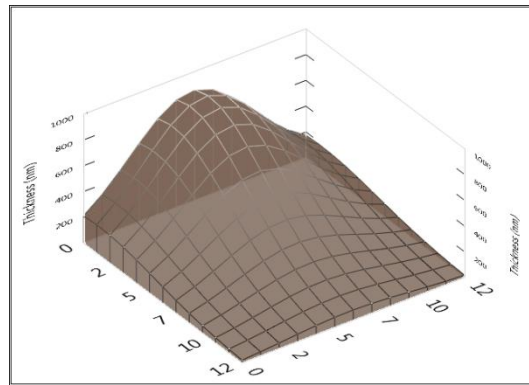

**Figure S2.** Top - Profilometer measurements of the deposited  $\text{Cu}_x\text{O}$  layer on glass. Bottom – the solution of the deposition profile after fitting eq 2 for each index in the library.

**Table S2.** Fitting parameters for the thickness of the  $\text{Cu}_x\text{O}$  using eq. 2.

|       |           |
|-------|-----------|
| $N_y$ | 11.69 mm  |
| $A_y$ | 889.57 nm |
| $h_y$ | 6.43 mm   |
| $N_x$ | 20.36 mm  |
| $h_x$ | 33.90 mm  |
| $H$   | 55.00 mm  |

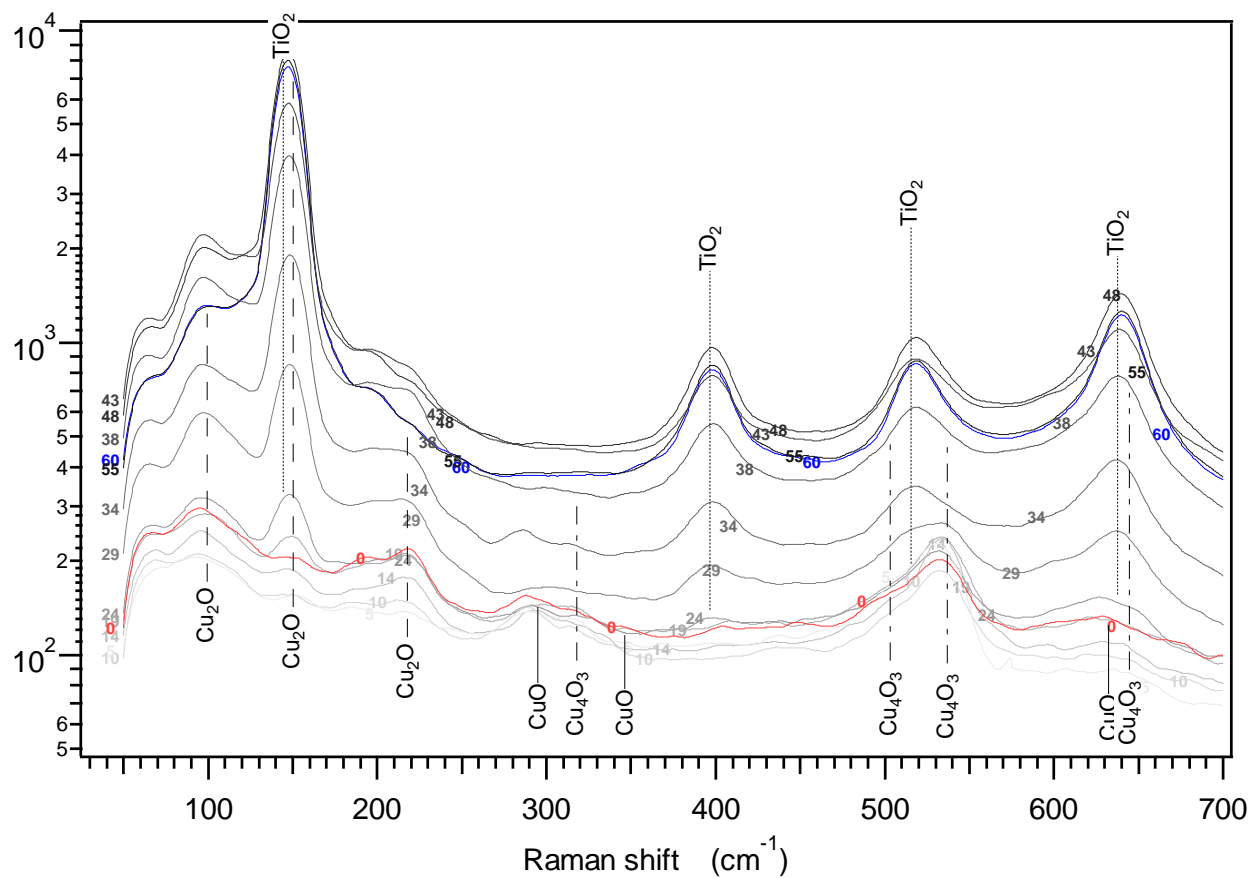

**Figure S3.** Raman spectra with peak allocation to CuO, Cu<sub>4</sub>O<sub>3</sub>, Cu<sub>2</sub>O and TiO<sub>2</sub> presented with logarithmic non-offset counts scale.

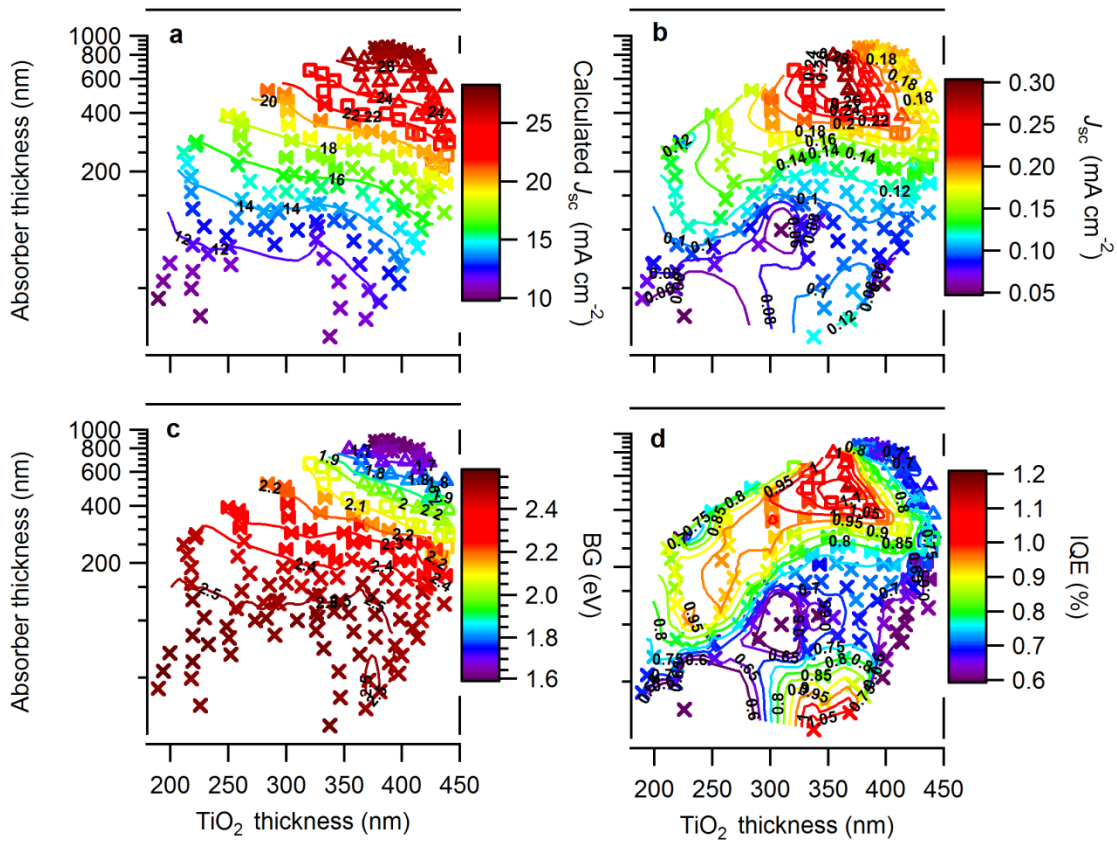

**Figure S4.** (a) Plot of maximum theoretical short circuit photocurrent ( $J_{calc}$ ) as a function of  $\text{TiO}_2$  and Cu-O layer thicknesses, with logarithmic absorber thickness scale. (b) Plot of short circuit photocurrent ( $J_{sc}$ ) as a function of layer thicknesses, with logarithmic absorber thickness scale. (c) Plot of fitted bandgaps (BG) as a function of layer thicknesses, with logarithmic absorber thickness scale. (d) Plot of calculated Internal Quantum Efficiency (IQE) as a function of layer thicknesses, with logarithmic absorber thickness scale.

t

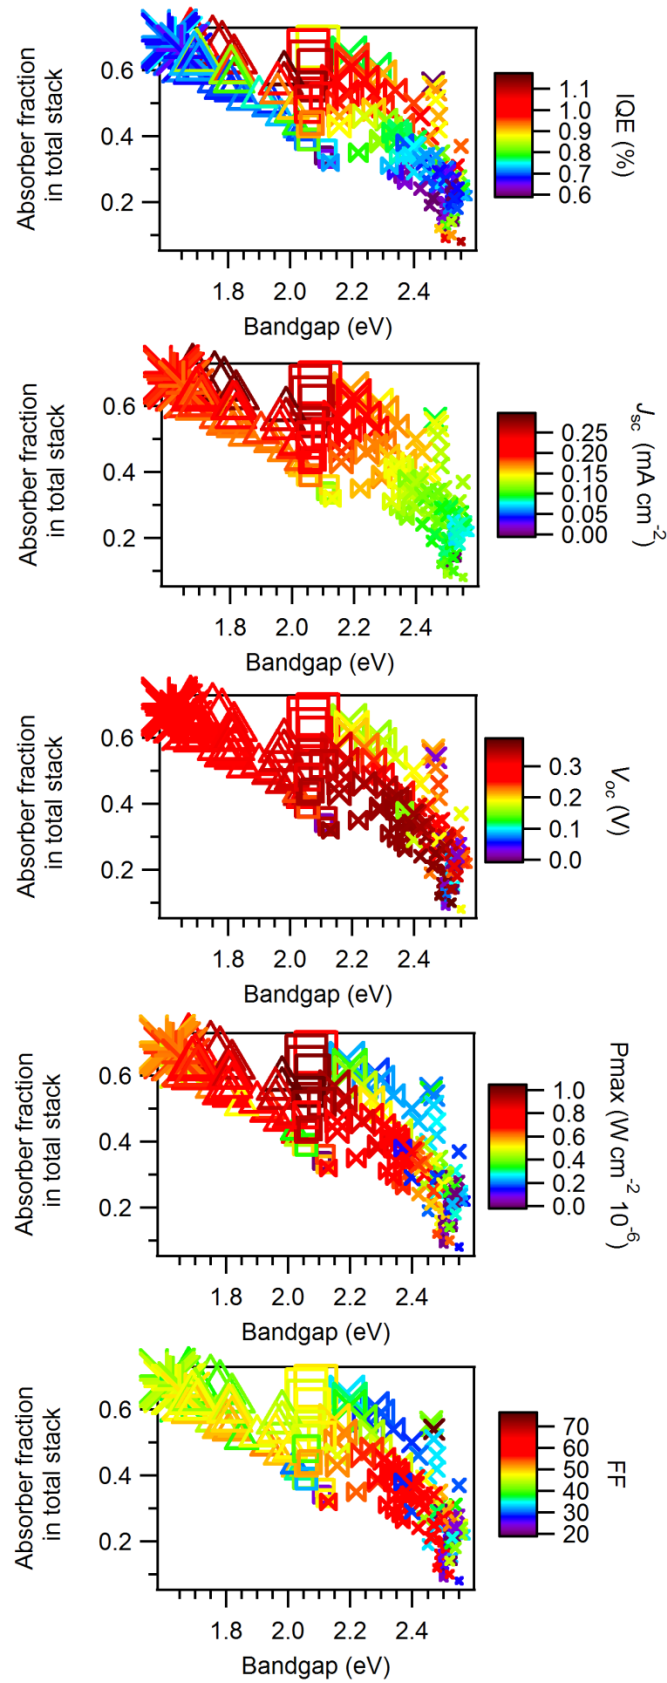

**Figure S5.** Internal quantum efficiency (IQE), short circuit photocurrent ( $J_{sc}$ ), Open circuit Photovoltage ( $V_{oc}$ ), maximum power (Pmax) and Fill Factor (FF), plotted as a function of absorber fraction in total stack and bandgap. The sizes of the symbols correlate with the absorber thickness.
